# Supplementary material for: Alteration of Lung and Gut Microbiota in IL-13-Transgenic Mice Simulating Chronic Asthma
Source: PubMed Central journal article supplement (PMC9728179; doi:10.4014/jmb.2009.09019), 2020-10-08
Supplement: JMB-30-12-1819-supple.pdf [file JMB-30-12-1819-supple.pdf]

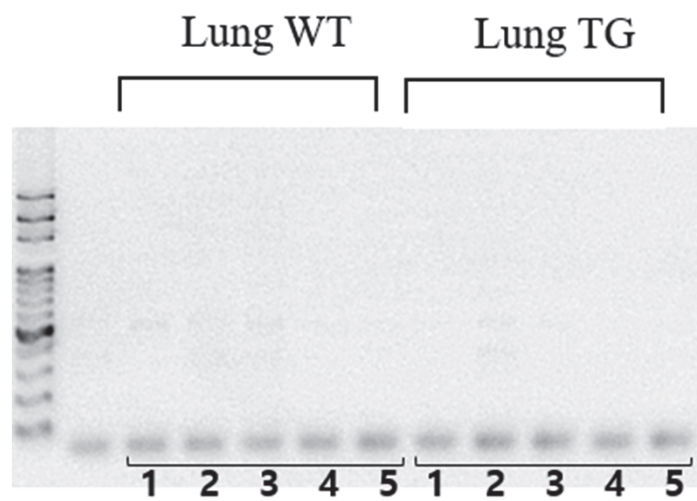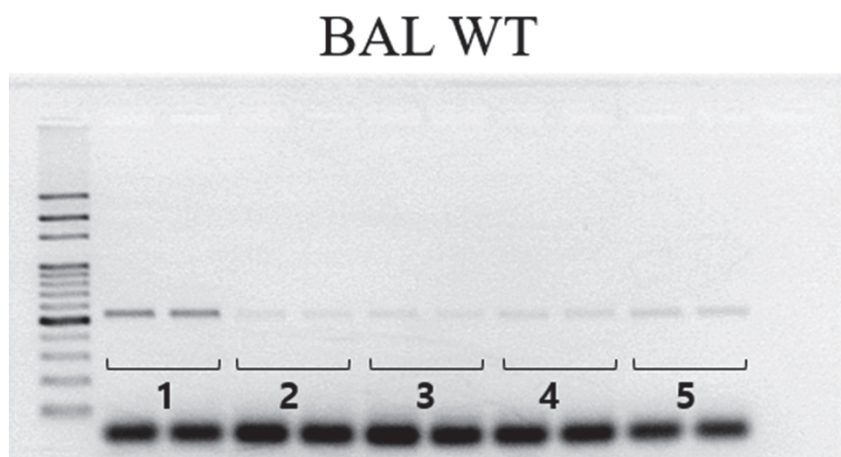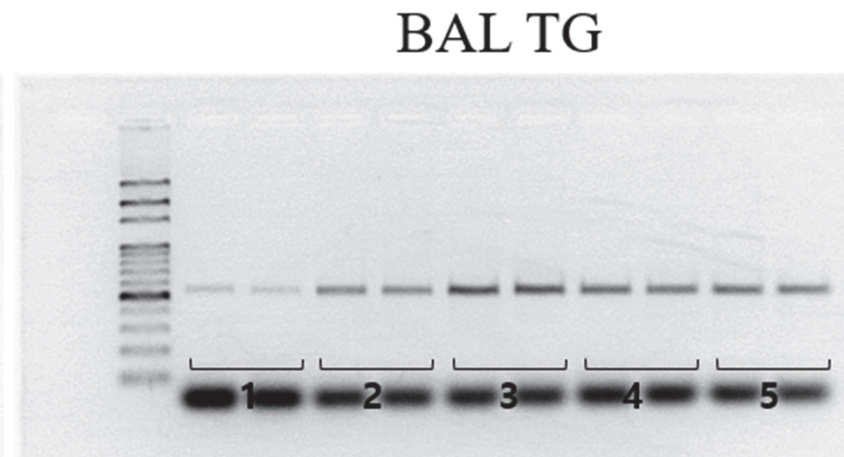

**Supplement B. Polymicrobial interactions within lung microbiome in the wild type mice and the IL-13 TG mice**

|                       |                       | Wild type mice          |         | IL-13 TG mice           |         |
|-----------------------|-----------------------|-------------------------|---------|-------------------------|---------|
|                       |                       | Correlation coefficient | P-value | Correlation coefficient | P-value |
| <i>Halomonas</i>      | <i>Bradyrhizobium</i> | -0.742                  | <0.001  | -0.793                  | 0.001   |
| <i>Halomonas</i>      | <i>Hydrotalea</i>     | 0.736                   | <0.001  | 0.651                   | 0.026   |
| <i>Acidovorax</i>     | <i>Variovorax</i>     | 0.979                   | <0.001  | 0.976                   | <0.001  |
| <i>Delftia</i>        | <i>Acidovorax</i>     | 0.741                   | <0.001  | 0.674                   | 0.019   |
| <i>Halomonas</i>      | <i>Mesorhizobium</i>  | -                       | -       | 0.677                   | 0.019   |
| <i>Halomonas</i>      | <i>Nitrobacter</i>    | -                       | -       | -0.770                  | 0.002   |
| <i>Cupriavidus</i>    | <i>Acidovorax</i>     | -                       | -       | -0.839                  | <0.001  |
| <i>Cupriavidus</i>    | <i>Variovorax</i>     | -                       | -       | -0.863                  | <0.001  |
| <i>Bradyrhizobium</i> | <i>Mesorhizobium</i>  | -                       | -       | -0.618                  | 0.038   |
| <i>Bradyrhizobium</i> | <i>Nitrobacter</i>    | -                       | -       | 0.815                   | 0.001   |
| <i>Delftia</i>        | <i>Burkholderia</i>   | -                       | -       | -0.626                  | 0.036   |
| <i>Delftia</i>        | <i>Salinispora</i>    | -                       | -       | -0.647                  | 0.026   |
| <i>Burkholderia</i>   | <i>Salinispora</i>    | -                       | -       | 0.941                   | <0.001  |
| <i>Halomonas</i>      | <i>Delftia</i>        | -0.481                  | 0.045   | -                       | -       |
| <i>Halomonas</i>      | <i>Cupriavidus</i>    | 0.649                   | 0.003   | -                       | -       |
| <i>Halomonas</i>      | <i>Hydrogenophaga</i> | -0.604                  | 0.008   | -                       | -       |
| <i>Hydrogenophaga</i> | <i>Delftia</i>        | 0.773                   | <0.001  | -                       | -       |
| <i>Hydrogenophaga</i> | <i>Acidovorax</i>     | 0.520                   | 0.028   | -                       | -       |
| <i>Acidovorax</i>     | <i>Bradyrhizobium</i> | 0.485                   | 0.045   | -                       | -       |
| <i>Hydrotalea</i>     | <i>Cupriavidus</i>    | 0.715                   | <0.001  | -                       | -       |
| <i>Hydrotalea</i>     | <i>Bradyrhizobium</i> | -0.584                  | 0.009   | -                       | -       |
| <i>Variovorax</i>     | <i>Delftia</i>        | 0.825                   | <0.001  | -                       | -       |
| <i>Variovorax</i>     | <i>Hydrogenophaga</i> | 0.583                   | 0.009   | -                       | -       |
| <i>Cupriavidus</i>    | <i>Aeromicrobium</i>  | 0.496                   | 0.040   | -                       | -       |
| <i>Hydrogenophaga</i> | <i>Bradyrhizobium</i> | 0.587                   | 0.009   | -                       | -       |

|                      |                      |       |       |   |   |
|----------------------|----------------------|-------|-------|---|---|
| <i>Mesorhizobium</i> | <i>Lactobacillus</i> | 0.537 | 0.022 | - | - |
| <i>Mesorhizobium</i> | <i>Aeromicrobium</i> | 0.641 | 0.003 | - | - |

---

**Supplement C. Polymicrobial interactions of gut genus pairs between IL-13 TG mice and control mice group**

|                     |                      | <b>Wild type group</b>  |                 | <b>IL-13 TG group</b>   |                 |
|---------------------|----------------------|-------------------------|-----------------|-------------------------|-----------------|
|                     |                      | Correlation coefficient | <i>P</i> -value | Correlation coefficient | <i>P</i> -value |
| <i>Oscillospira</i> | <i>Ruminococcus</i>  | 0.717                   | 0.007           | 0.744                   | 0.021           |
| <i>Clostridium</i>  | <i>Adlercreutzia</i> | 0.651                   | 0.029           | -                       | -               |
| <i>Bacteroides</i>  | <i>Lactobacillus</i> | -                       | -               | 0.796                   | 0.008           |

**Supplement D. Lung-gut microbial interactions in IL-13 TG mice**

| Lung                  | Gut                    | IL-13 TG group          |         |
|-----------------------|------------------------|-------------------------|---------|
|                       |                        | Correlation coefficient | P-value |
| <i>Mesorhizobium</i>  | <i>Agathobaculum</i>   | 0.826                   | 0.007   |
|                       | <i>Bifidobacterium</i> | 0.788                   | 0.013   |
|                       | <i>Parabacteroides</i> | 0.752                   | 0.025   |
|                       | <i>AJ518873</i>        | 0.910                   | <0.001  |
|                       | <i>EU475449</i>        | 0.802                   | 0.013   |
|                       | <i>EU475512</i>        | 0.776                   | 0.014   |
|                       | <i>PAC000683</i>       | 0.789                   | 0.013   |
| <i>Hydrogenophaga</i> | <i>Oscillospira</i>    | -0.780                  | 0.014   |
